# Supplementary material for: Analysis of Metal-Binding Features of the Wild Type and Two Domain-Truncated Mutant Variants of Littorina littorea Metallothionein Reveals Its Cd-Specific Character
Source: PubMed Central journal article supplement (PMC5535943; doi:10.3390/ijms18071452), 2017-07-06
Supplement: ijms-18-01452-s001.pdf [file ijms-18-01452-s001.pdf]

**LlwtMT: wild type *Littorina littorea* MT**

LlwtMT cDNA sequence for cloning in pGEX-4T-1 plasmid

TTTATTGGATCCATGAGCTCTGTGTTTCGGAGCAGGTTGCACTGATGTGTGTAAGCAAACCCCATGC  
GGGTGTGCAACCAGTGGATGTAAGTGTACCGACGATTGCAAATGTCAGTCGTGTAATAACGGCGCC  
GGGTGCACCGATACTGCAAGCAGACGCCGTGTGGATGCGGTTCTGGGTGCAACTGCAAGGAAGAT  
TGCCGCTGCCAATCGTGTCTACGGCCTGTAAATGCGCAGCGGGCTCTTGCAAATGCGGTAAAGGT  
TGTACCGGGCCTGATTCGTGTAAGTGTGACCGCAGCTGCTCATGCAAATGACTCGAGAAA

LlwtMT protein sequence

MSSVFGAGCTDVCKQTPCGCATSGCNCTDDCKQSKYGAGCTDTCKQTPCGSGGCNCKEDCRCQSCSTAC  
KCAAGSCKCGKGCTGPDSCCKDRSCSCK\*

**Lltr1MT: truncated 1 of *Littorina littorea* MT**

Lltr1MT cDNA sequence for cloning in pGEX plasmid

TTTATTGGATCCATGGGTGCGGGCTGCACTGACACTTGTAAACAAACCCCATGCGGTTGCGGCAGT  
GGCTGCAATTGCAAAGAAGATTGCCGTTGCCAGTCGTGTTCTACGGCATGTAAATGCGCCGCAGGT  
TCTTGCAAATGCGGTAAAGGCTGCACGGGTCCAGATAGCTGTAAATGTGACCGTTCGTGCAGCTGT  
AAATGACTCGAGAAA

Lltr1MT protein sequence

MGAGCTDTCKQTPCGSGGCNCKEDCRCQSCSTACKCAAGSCKCGKGCTGPDSCCKDRSCSCK\*

**Lltr2MT: truncated 2 of *Littorina littorea* MT (with SSVF peptide)**

Lltr2MT cDNA sequence for cloning in pGEX plasmid

TTTATTGGATCCATGAGTAGTGTATTCGGGGCAGGTTGTACGGATACCTGCAAGCAGACCCCGTGT  
GGCTGCGGTAGTGGATGCAACTGCAAAGAAGATTGTCGTTGCCAGTCGTGTTCAACCGCTTGCAA  
TGCGCCGCAGGTAGCTGCAAATGCGGCAAAGGCTGCACCGGACCGGACTCTTGTAAGTGTGACCGT  
TCTTGTTTCATGTAAGTAACTCGAGAAA

Lltr2MT protein sequence

MSSVFGAGCTDTCKQTPCGSGGCNCKEDCRCQSCSTACKCAAGSCKCGKGCTGPDSCCKDRSCSCK\*

**Figure S1.** cDNA and protein sequence information of the proteins studied in this work. The constructs Lltr1MT and Lltr2MT are shown in comparison to LlwtMT. Both cDNA and protein sequences are shown, and the grey boxes indicate the 5' and 3' restriction sites (*Bam*HI and *Xho*I, respectively) used for cloning into the pGEX-4T-1 plasmid. Highlighted in yellow is the SSVF N-term sequence and in green the first metal binding domain that is removed in the mutated proteins.
